# Supplementary material for: Interplay between thyroid cancer cells and macrophages: effects on IL-32 mediated cell death and thyroid cancer cell migration
Source: Springer Nature journal article supplement (doi:10.1007/s13402-019-00457-9), 2019-06-14
Supplement: MOESM1 [file 16813666]

1 **SUPPLEMENT**

2

3 **Interplay between thyroid cancer cells and macrophages: effects on IL-32 mediated cell**  
4 **death and thyroid cancer cell migration.**

5

6 Yvette J.E. Sloot, MD, Katrin Rabold, MSc, Thomas Ulas PhD, Dennis M. De Graaf MSc, Bas  
7 Heinhuis, PhD, Kristian Händler, PhD, Joachim L. Schultze, MD, PhD, Mihai G. Netea, MD,  
8 PhD., Johannes W.A. Smit, MD PhD, Leo A.B. Joosten, PhD, Romana T. Netea-Maier, MD,  
9 PhD.

10 **Supplementary Figures**

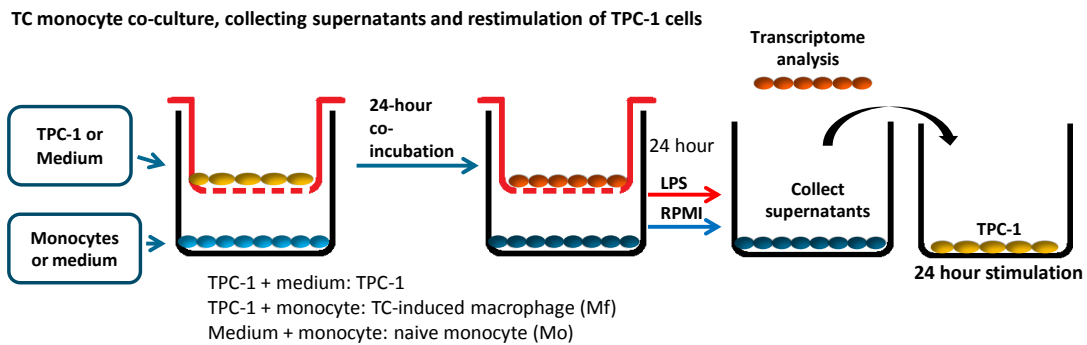

11

12 **Supplementary Figure S1 Experimental Set-up.** The upper well contains TPC-1 cells or Medium,

13 while the bottom well contains monocytes or medium. TC cells and monocytes are co-cultured for 24

14 hours, creating naive TPC-1 cells, TC-induced macrophages (Mf) and Naive monocytes (mo). Next, LPS

15 (TLR-4 ligand) or RPMI (medium control) were added to the bottom well for 24 hours. TPC-1 cells are

16 collected for transcriptome analysis, supernatants are collected for conditioned medium

17 experiments.

18

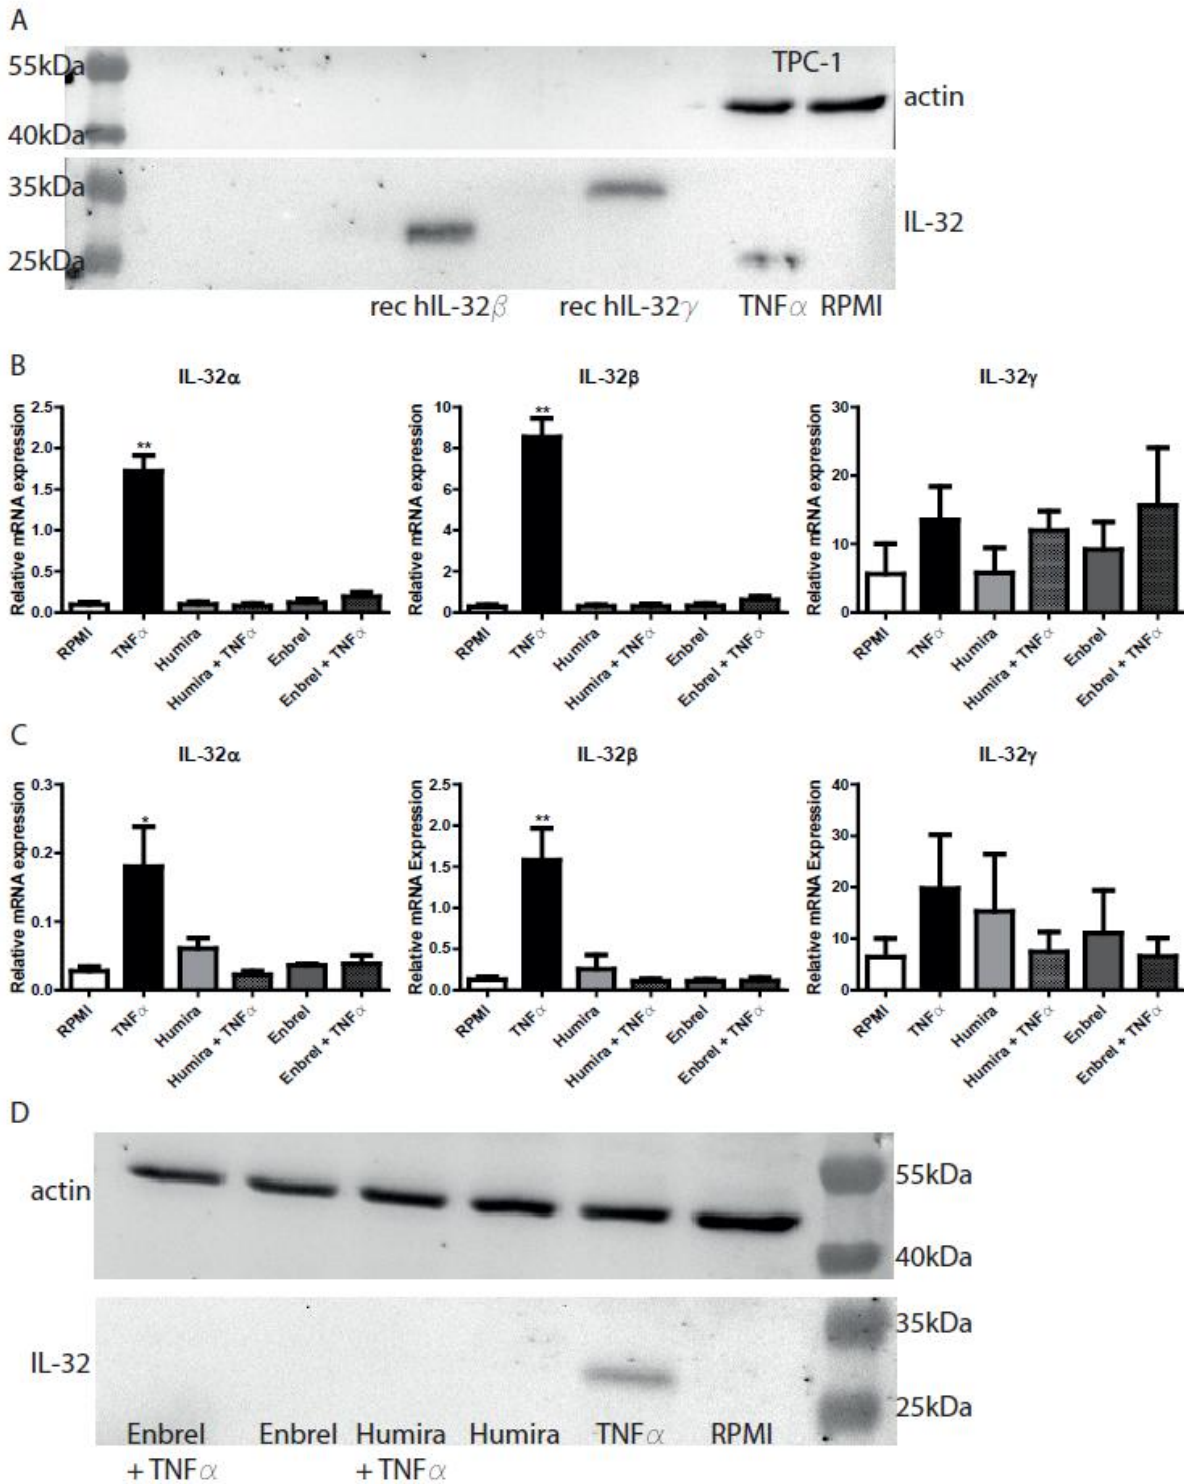

19 **Supplementary Figure S2 TNF $\alpha$ -mediated IL-32 mRNA and protein expression in different**  
 20 **TC cell lines.** A) Western blot analysis demonstrating IL-32 $\beta$  protein expression in TPC-1 cells;  
 21 Human recombinant IL-32 $\beta$  and IL-32 $\gamma$  was loaded on the blot as control. B) Relative mRNA  
 22 expression of IL-32 $\alpha$ , IL-32 $\beta$  and IL-32 $\gamma$  isoforms in FTC-133 cells after stimulation with TNF $\alpha$   
 23 and in the presence of Enbrel (etanercept, decoy TNF $\alpha$ -receptor, 10  $\mu$ g/ml) or Humira

24 (adalimumab, monoclonal TNF $\alpha$  antibody, 10 ug/ml). C) Relative mRNA expression of IL-32 $\alpha$ ,  
25 IL-32 $\beta$  and IL-32 $\gamma$  isoforms in BC-PAP cells after stimulation with TNF $\alpha$  and in the presence of  
26 Enbrel or Humira. Results from 3 experiments, 1-3 replicates per experiment. E) Western  
27 blot analysis showing IL-32 protein expression in FTC-133 after stimulation with TNF $\alpha$  and in  
28 the presence of Enbrel or Humira. Data are represented as mean  $\pm$  SEM; \*  $p < 0.05$ , \*\*  $p < 0.01$ ,  
29 by Mann-Whitney-U test or Kruskal-Wallis test with Dunn's multiple comparison test.  
30

31 **Supplemental methods**

32

33 **Western blot using human recombinant IL-32 $\beta$  and IL-32 $\gamma$**

34 human recombinant IL-32 $\beta$  and IL-32 $\gamma$  (R&D systems, Minneapolis, MN, USA) was diluted to  
35 a concentration of 2,5 ng/ml. A total of 100 pg/lane was loaded on a pre-casted 4-15% gel  
36 (Bio-Rad, CA, USA) for polyacrylamide gel electrophoresis. Further procedure described in  
37 manuscript.

38 **Supplementary table S1** Primer sequences

| <b>Target</b>  | <b>Forward 5'&gt; 3'</b> | <b>Reverse 5'&gt; 3'</b> |
|----------------|--------------------------|--------------------------|
| IL-32 $\alpha$ | GCTGGAGGACGACTTCAAAGA    | GGGCTCCGTAGGACTTGTCA     |
| MMP2           | TACAGGATCATTGGCTACACACC  | GGTCACATCGCTCCAGACT      |
| MMP3           | CTGGACTCCGACACTCTGGA     | CAGGAAAGGTTCTGAAGTGACC   |
| MMP9           | TGTACCGCTATGGTTACACTCG   | GGCAGGGACAGTTGCTTCT      |
| IL-8           | ACTGAGAGTGATTGAGAGTGGAC  | AACCCTCTGCACCCAGTTTTTC   |
| E-cadherin     | AAAGGCCCATTTCTAAAAACCT   | TGCGTTCTCTATCCAGAGGCT    |
| VEGF           | AGGGCAGAATCATCACGAAGT    | AGGGTCTCGATTGGATGGCA     |
| B2M            | ATGAGTATGCCTGCCGTGTG     | CCAAATGCGGCATCTTCAAAC    |
| GAPDH          | AGGGAGATTCAGTGTGGTG      | CGACCACTTTGTCAAGCTCA     |

39
